# Supplementary material for: Framework of Methodology to Assess the Link between A Posteriori Dietary Patterns and Nutritional Adequacy: Application to Pregnancy
Source: MDPI journal article supplement (doi:10.3390/metabo12050395), 2022-04-27
Supplement: s1 [file s1]

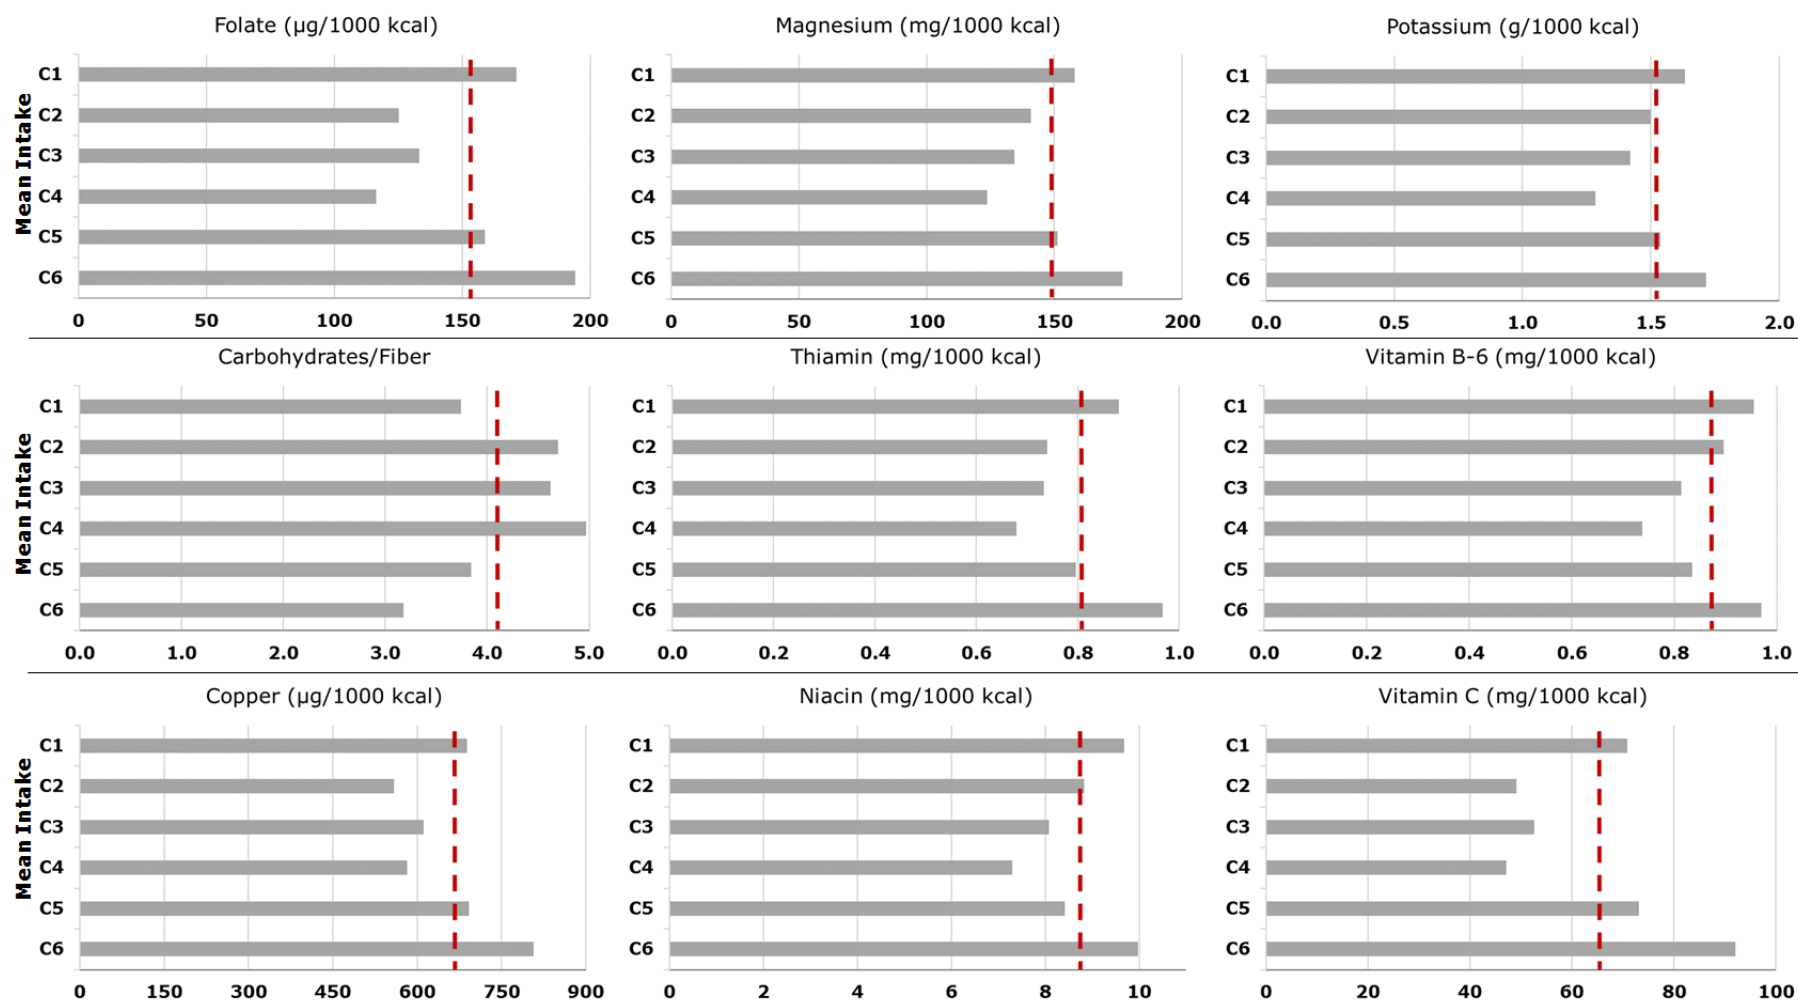

**Supplementary Figure S1.** Mean intake of nutrients with absolute factor score  $\geq 0.5$  in “Plant origin” factor, among the six clusters (C1-C6) and in total sample (— — —).

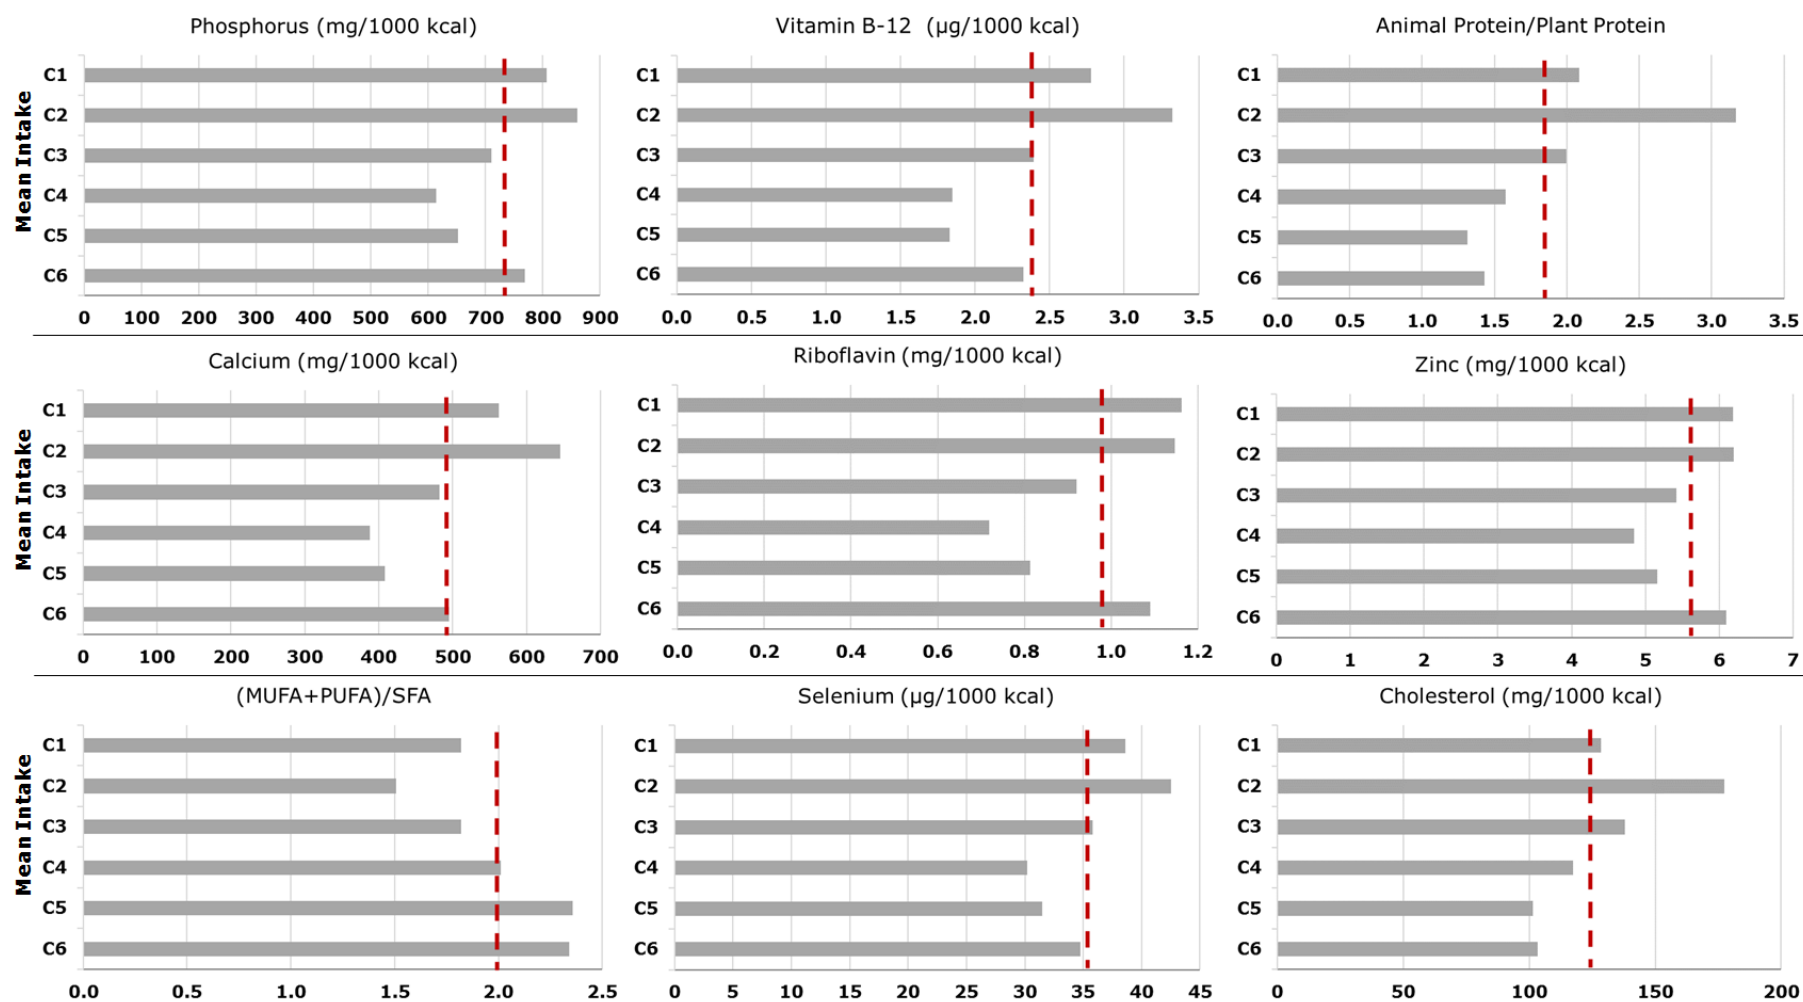

**Supplementary Figure S2.** Mean intake of nutrients with absolute factor score  $\geq 0.5$  in “Animal origin” factor, across the six clusters (C1-C6) and in total sample (— — —). MUFA: Monounsaturated fatty acids; PUFA: Polyunsaturated fatty acids; SFA: Saturated fatty acids.

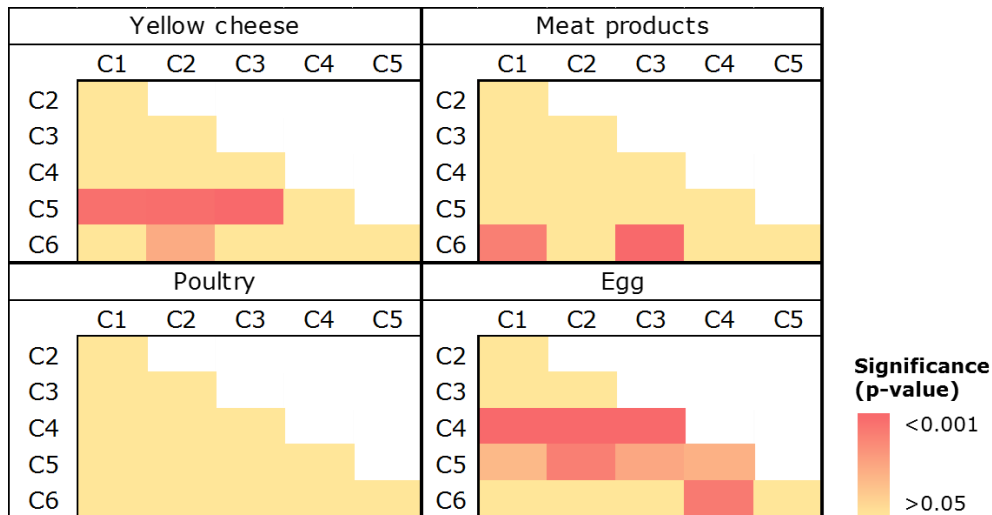

**Supplementary Figure S3.** Comparison of energy contribution of selected food groups across the six clusters (C1-C6); Statistical significance was assessed at  $\alpha=0.05$  ( $p \leq 0.05$ ) using the Mann-Whitney U test.

**Supplementary Table S1.** Percentile distribution of probability of adequacy for macronutrients, phosphorus, folate and vitamin B-12

|           | Protein    |            |            |            |            | Carbohydrate |            |            |            |            |
|-----------|------------|------------|------------|------------|------------|--------------|------------|------------|------------|------------|
|           | <i>P10</i> | <i>P25</i> | <i>P50</i> | <i>P75</i> | <i>P90</i> | <i>P10</i>   | <i>P25</i> | <i>P50</i> | <i>P75</i> | <i>P90</i> |
| <b>C1</b> | 95         | 100        | 100        | 100        | 100        | 98           | 100        | 100        | 100        | 100        |
| <b>C2</b> | 100        | 100        | 100        | 100        | 100        | 83           | 94         | 99         | 100        | 100        |
| <b>C3</b> | 79         | 100        | 100        | 100        | 100        | 99           | 100        | 100        | 100        | 100        |
| <b>C4</b> | 59         | 99         | 100        | 100        | 100        | 100          | 100        | 100        | 100        | 100        |
| <b>C5</b> | 81         | 99         | 100        | 100        | 100        | 100          | 100        | 100        | 100        | 100        |
| <b>C6</b> | 93         | 100        | 100        | 100        | 100        | 100          | 100        | 100        | 100        | 100        |

  

|           | Phosphorus |            |            |            |            | Folate     |            |            |            |            |
|-----------|------------|------------|------------|------------|------------|------------|------------|------------|------------|------------|
|           | <i>P10</i> | <i>P25</i> | <i>P50</i> | <i>P75</i> | <i>P90</i> | <i>P10</i> | <i>P25</i> | <i>P50</i> | <i>P75</i> | <i>P90</i> |
| <b>C1</b> | 100        | 100        | 100        | 100        | 100        | 0          | 0          | 0          | 0          | 3          |
| <b>C2</b> | 100        | 100        | 100        | 100        | 100        | 0          | 0          | 0          | 0          | 0          |
| <b>C3</b> | 100        | 100        | 100        | 100        | 100        | 0          | 0          | 0          | 0          | 0          |
| <b>C4</b> | 100        | 100        | 100        | 100        | 100        | 0          | 0          | 0          | 0          | 0          |
| <b>C5</b> | 100        | 100        | 100        | 100        | 100        | 0          | 0          | 0          | 0          | 3          |
| <b>C6</b> | 100        | 100        | 100        | 100        | 100        | 0          | 0          | 1          | 6          | 33         |

  

|           | Vitamin B-12 |            |            |            |            |
|-----------|--------------|------------|------------|------------|------------|
|           | <i>P10</i>   | <i>P25</i> | <i>P50</i> | <i>P75</i> | <i>P90</i> |
| <b>C1</b> | 100          | 100        | 100        | 100        | 100        |
| <b>C2</b> | 100          | 100        | 100        | 100        | 100        |
| <b>C3</b> | 100          | 100        | 100        | 100        | 100        |
| <b>C4</b> | 99           | 100        | 100        | 100        | 100        |
| <b>C5</b> | 92           | 100        | 100        | 100        | 100        |
| <b>C6</b> | 100          | 100        | 100        | 100        | 100        |

*P*: Percentile; k-percentile is the k% of individuals in each cluster that is below to the respective probability of adequacy, e.g. in the case of protein, almost 18 participants in C1 (*P10*) had a probability of adequacy below 95%; C: Cluster; Number of participants in each cluster: C1 (n=179), C2 (n=33), C3 (n=142), C4 (n=67), C5 (n=127), C6 (n=60).

**Supplementary Table S2.** Applied methods for estimating the nutrient adequacy for the macro- and micronutrients under study.

|    |                     | <b>Probability<br/>approach</b> | <b>EAR cut-point<br/>method</b> | <b>Comments</b>    |
|----|---------------------|---------------------------------|---------------------------------|--------------------|
| 1  | <b>Protein</b>      | +                               |                                 |                    |
| 2  | <b>Carbohydrate</b> | +                               |                                 |                    |
| 3  | <b>Fiber</b>        |                                 | +                               | Established AI     |
| 4  | <b>Thiamin</b>      | +                               |                                 |                    |
| 5  | <b>Riboflavin</b>   | +                               |                                 |                    |
| 6  | <b>Niacin</b>       | +                               |                                 |                    |
| 7  | <b>Vitamin B-6</b>  | +                               |                                 |                    |
| 8  | <b>Folate</b>       | +                               |                                 |                    |
| 9  | <b>Vitamin B-12</b> | +                               |                                 |                    |
| 10 | <b>Vitamin C</b>    | +                               |                                 |                    |
| 11 | <b>Calcium</b>      |                                 | +                               | Not established SD |
| 12 | <b>Phosphorus</b>   | +                               |                                 |                    |
| 13 | <b>Magnesium</b>    | +                               |                                 |                    |
| 14 | <b>Potassium</b>    |                                 | +                               | Established AI     |
| 15 | <b>Zinc</b>         | +                               |                                 |                    |
| 16 | <b>Copper</b>       | +                               |                                 |                    |
| 17 | <b>Selenium</b>     | +                               |                                 |                    |

AI: Adequate Intake; SD: standard deviation
